# Supplementary material for: HIV-dependent depletion of influenza-specific memory B cells impacts B cell responsiveness to seasonal influenza immunisation
Source: PubMed Central journal article supplement (PMC4879526; doi:10.1038/srep26478), 2016-05-25
Supplement: srep26478-s1.pdf [file srep26478-s1.pdf]

## **HIV-dependent depletion of influenza-specific memory B cells impacts B cell responsiveness to seasonal influenza immunisation**

Adam K Wheatley\*<sup>1,3</sup>, Anne B Kristensen<sup>1</sup>, William N Lay<sup>1</sup> and Stephen J Kent<sup>1,2,3</sup>

<sup>1</sup> Department of Microbiology and Immunology at the Peter Doherty Institute for Infection and Immunity, The University of Melbourne, Melbourne, Australia

<sup>2</sup> Melbourne Sexual Health Centre and Department of Infectious Diseases, Alfred Health, Central Clinical School, Monash University, Melbourne, Australia

<sup>3</sup> ARC Centre of Excellence in Convergent Bio-Nano Science and Technology, University of Melbourne, Parkville, Australia

**\*Corresponding Author:** AK Wheatley, Department of Microbiology and Immunology, University of Melbourne at the Peter Doherty Institute for Infection and Immunity, 792 Elizabeth Street, Melbourne VIC 3000, Australia.

Tel.: +61390354179; fax: +61 383445740;

E-mail address: [a.wheatley@unimelb.edu.au](mailto:a.wheatley@unimelb.edu.au)

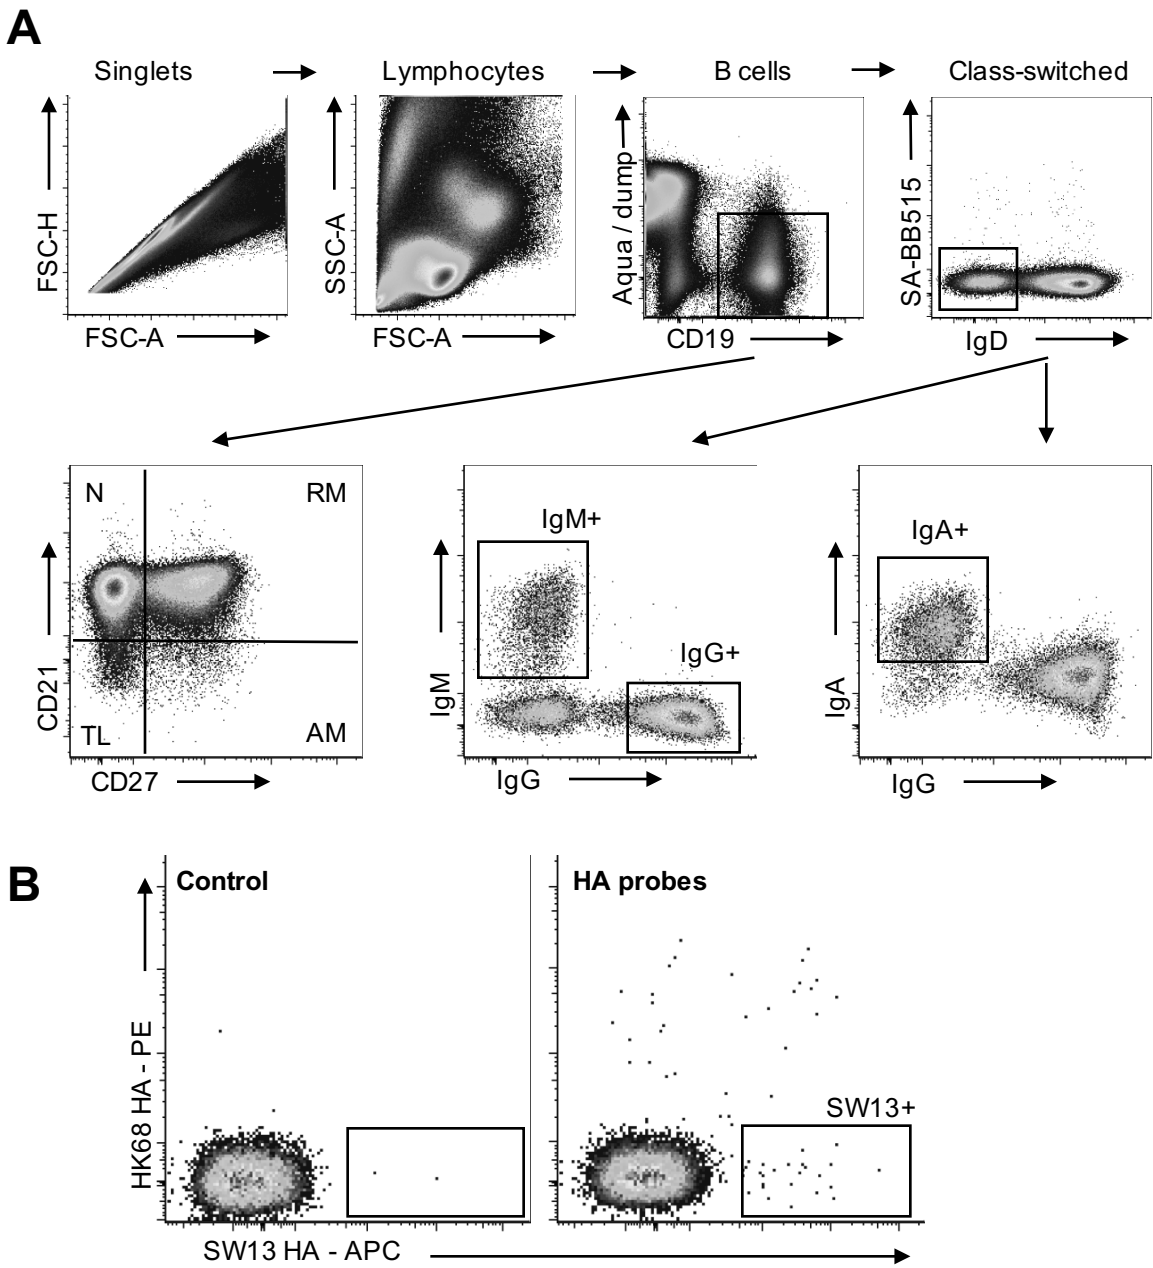

**Supplementary Figure 1.** Representative flow cytometry gating. **(A)** The phenotype of single, live CD19<sup>+</sup> B lymphocytes was assessed using surface markers CD21 and CD27. CD27<sup>-</sup> CD21<sup>+</sup> naïve (N), CD27<sup>+</sup> CD21<sup>+</sup> resting memory (RM), CD27<sup>+</sup> CD21<sup>-</sup> activated memory (AM) and CD27<sup>-</sup> CD21<sup>-</sup> tissue-like populations (TL) are denoted. Surface immunoglobulin expression was determined by co-staining for IgG, IgA and IgM subclasses. **(B)** Class-switched B cells not binding decoy streptavidin-BB515 (SA-BB515) were co-stained with recombinant HA probes. Positive gates were established with reference to cells stained with control probes (SA-conjugates alone).

**A**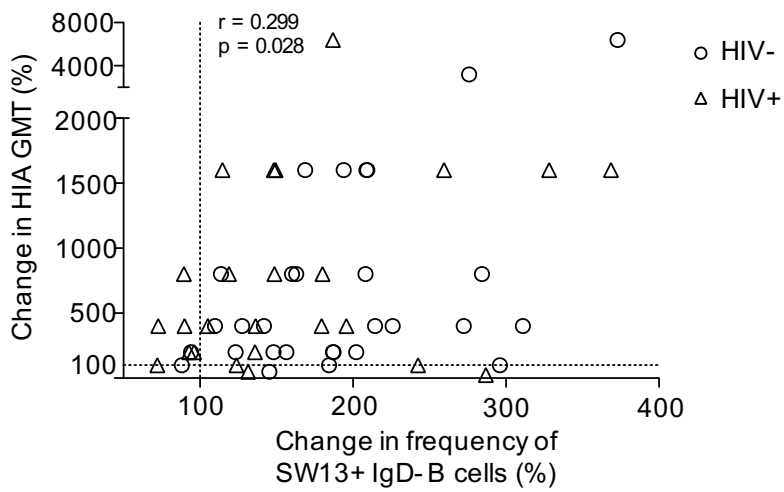**B**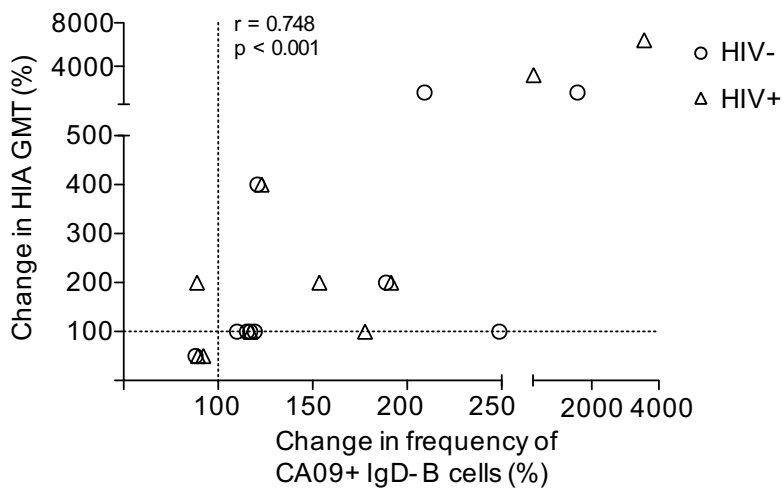

**Supplementary Figure 2.** Correlations between IIV3-elicited changes in (A) SW13+ or (B) CA09+ memory B cell frequencies and HI activity (GMT).

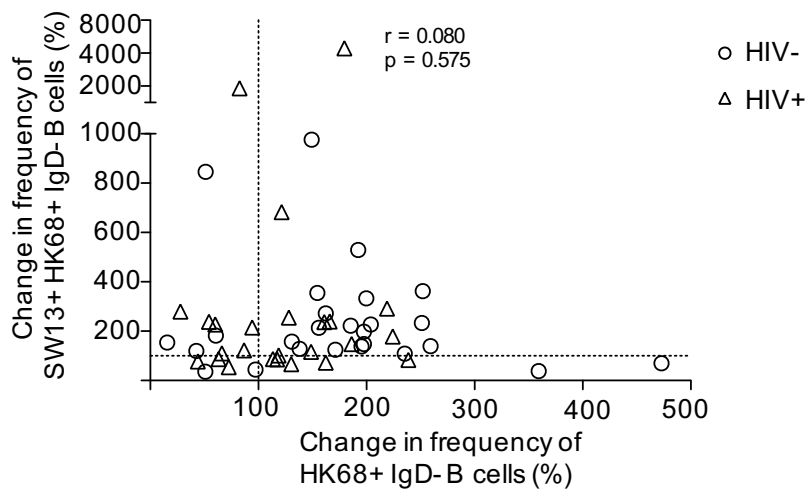

**Supplementary Figure 3.** No correlation between post-IIV3 expansions of HK68+ and HK68+SW13+ memory B cells.
